# Supplementary material for: A Metabolic Choreography of Maize Plants Treated with a Humic Substance-Based Biostimulant under Normal and Starved Conditions
Source: MDPI journal article supplement (doi:10.3390/metabo11060403), 2021-06-20
Supplement: s1 [file s1]

## Supplementary Materials

### GNPS LINK DIRECTORIES

GNPS JOB links:

(1) Negative mode:

FBMN: <https://gnps.ucsd.edu/ProteoSAFe/status.jsp?task=2d4d953a6c0846da81b4f804a7515a28>

MolNetEnhancer:

<https://gnps.ucsd.edu/ProteoSAFe/status.jsp?task=af3336a79c90441e9d990e8d55066302>

(2) Positive mode:

FBMN: <https://gnps.ucsd.edu/ProteoSAFe/status.jsp?task=de0059c12a2d4e9a9dec044eb60813e9>

MolNetEnhancer:

<https://gnps.ucsd.edu/ProteoSAFe/status.jsp?task=a8af348c4de74d18811b3af8ee041382>

Spectral information of caffeoylquinic acid (m/z 353.08)

[https://metabolomics-usi.ucsd.edu/mirror?usi1=mzspec%3AGNPS%3ATASK-](https://metabolomics-usi.ucsd.edu/mirror?usi1=mzspec%3AGNPS%3ATASK-2d4d953a6c0846da81b4f804a7515a28-spectra%2Fspecs_ms.mgf%3Ascan%3A2381&usi2=mzspec%3AGNPS%3AGNPS%3AGNPS-LIBRARY%3Aaccession%3ACCMSLIB00005743945&width=10.0&height=6.0&mz_min=&mz_max=&max_intensity=150.0&grid=true&annotate_peaks=[[191.0522,353.0895],[135.0446,191.0557,353.0876]]&annotate_precision=4&annotation_rotation=90&cosine=standard&fragment_mz_tolerance=0.02)

[2d4d953a6c0846da81b4f804a7515a28-](https://metabolomics-usi.ucsd.edu/mirror?usi1=mzspec%3AGNPS%3ATASK-2d4d953a6c0846da81b4f804a7515a28-spectra%2Fspecs_ms.mgf%3Ascan%3A2381&usi2=mzspec%3AGNPS%3AGNPS%3AGNPS-LIBRARY%3Aaccession%3ACCMSLIB00005743945&width=10.0&height=6.0&mz_min=&mz_max=&max_intensity=150.0&grid=true&annotate_peaks=[[191.0522,353.0895],[135.0446,191.0557,353.0876]]&annotate_precision=4&annotation_rotation=90&cosine=standard&fragment_mz_tolerance=0.02)

[spectra%2Fspecs\\_ms.mgf%3Ascan%3A2381&usi2=mzspec%3AGNPS%3AGNPS%3AGNPS-](https://metabolomics-usi.ucsd.edu/mirror?usi1=mzspec%3AGNPS%3ATASK-2d4d953a6c0846da81b4f804a7515a28-spectra%2Fspecs_ms.mgf%3Ascan%3A2381&usi2=mzspec%3AGNPS%3AGNPS%3AGNPS-LIBRARY%3Aaccession%3ACCMSLIB00005743945&width=10.0&height=6.0&mz_min=&mz_max=&max_intensity=150.0&grid=true&annotate_peaks=[[191.0522,353.0895],[135.0446,191.0557,353.0876]]&annotate_precision=4&annotation_rotation=90&cosine=standard&fragment_mz_tolerance=0.02)

[LIBRARY%3Aaccession%3ACCMSLIB00005743945&width=10.0&height=6.0&mz\\_min=&mz\\_max=&max\\_intensity=150.0&grid=true&annotate\\_peaks=\[\[191.0522,353.0895\],\[135.0446,191.0557,353.0876\]\]&annotate\\_precision=4&annotation\\_rotation=90&cosine=standard&fragment\\_mz\\_tolerance=0.02](https://metabolomics-usi.ucsd.edu/mirror?usi1=mzspec%3AGNPS%3ATASK-2d4d953a6c0846da81b4f804a7515a28-spectra%2Fspecs_ms.mgf%3Ascan%3A2381&usi2=mzspec%3AGNPS%3AGNPS%3AGNPS-LIBRARY%3Aaccession%3ACCMSLIB00005743945&width=10.0&height=6.0&mz_min=&mz_max=&max_intensity=150.0&grid=true&annotate_peaks=[[191.0522,353.0895],[135.0446,191.0557,353.0876]]&annotate_precision=4&annotation_rotation=90&cosine=standard&fragment_mz_tolerance=0.02)

**Table S1: Metabolic pathway analysis (MetPA).**

| Arranged by pathway impact |                                                       |       |      |         |        |
|----------------------------|-------------------------------------------------------|-------|------|---------|--------|
| Number                     | Pathway name                                          | Total | Hits | p-value | Impact |
| 1                          | Isoquinoline alkaloid biosynthesis                    | 6     | 1    | 0.13    | 0.50   |
| 2                          | Phenylalanine metabolism                              | 11    | 1    | 0.23    | 0.47   |
| 3                          | alpha-Linolenic acid metabolism                       | 28    | 3    | 0.02    | 0.38   |
| 4                          | Tryptophan metabolism                                 | 28    | 2    | 0.13    | 0.32   |
| 5                          | Glycine, serine and threonine metabolism              | 33    | 4    | 0.01    | 0.30   |
| 6                          | Cysteine and methionine metabolism                    | 46    | 5    | 0.00    | 0.20   |
| 8                          | Stilbenoid, diarylheptanoid and gingerol biosynthesis | 8     | 1    | 0.17    | 0.13   |
| 9                          | Alanine, aspartate and glutamate metabolism           | 22    | 2    | 0.09    | 0.13   |
| 10                         | Glyoxylate and dicarboxylate metabolism               | 29    | 2    | 0.14    | 0.12   |
| 7                          | Aminoacyl-tRNA biosynthesis                           | 46    | 12   | 0.00    | 0.11   |
| 11                         | Tyrosine metabolism                                   | 16    | 1    | 0.31    | 0.11   |
| 12                         | Arginine and proline metabolism                       | 34    | 1    | 0.55    | 0.07   |
| 13                         | Sulfur metabolism                                     | 15    | 2    | 0.04    | 0.06   |
| 14                         | Citrate cycle (TCA cycle)                             | 20    | 1    | 0.37    | 0.05   |
| 15                         | Phenylpropanoid biosynthesis                          | 46    | 2    | 0.28    | 0.03   |
| 16                         | Phenylalanine, tyrosine and tryptophan biosynthesis   | 22    | 3    | 0.01    | 0.02   |
| 17                         | Flavonoid biosynthesis                                | 47    | 1    | 0.67    | 0.02   |
| 18                         | Glutathione metabolism                                | 26    | 1    | 0.46    | 0.01   |
| 19                         | Carotenoid biosynthesis                               | 43    | 1    | 0.64    | 0.01   |
| 20                         | Purine metabolism                                     | 63    | 1    | 0.78    | 0.00   |
| Arranged by p-value        |                                                       |       |      |         |        |
| 7                          | Aminoacyl-tRNA biosynthesis                           | 46    | 12   | 0.00    | 0.11   |
| 6                          | Cysteine and methionine metabolism                    | 46    | 5    | 0.00    | 0.20   |

|           |                                                     |    |   |      |      |
|-----------|-----------------------------------------------------|----|---|------|------|
| <b>21</b> | Cyanoamino acid metabolism                          | 29 | 4 | 0.00 | -    |
| <b>5</b>  | Glycine, serine and threonine metabolism            | 33 | 4 | 0.01 | 0.30 |
| <b>16</b> | Phenylalanine, tyrosine and tryptophan biosynthesis | 22 | 3 | 0.01 | 0.02 |
| <b>22</b> | Valine, leucine and isoleucine biosynthesis         | 22 | 3 | 0.01 | -    |
| <b>23</b> | Glucosinolate biosynthesis                          | 65 | 5 | 0.01 | -    |
| <b>3</b>  | alpha-Linolenic acid metabolism                     | 28 | 3 | 0.02 | 0.38 |
| <b>24</b> | Sulfur metabolism                                   | 15 | 2 | 0.04 | 0.06 |
| <b>25</b> | Carbon fixation in photosynthetic organisms         | 21 | 2 | 0.08 | -    |

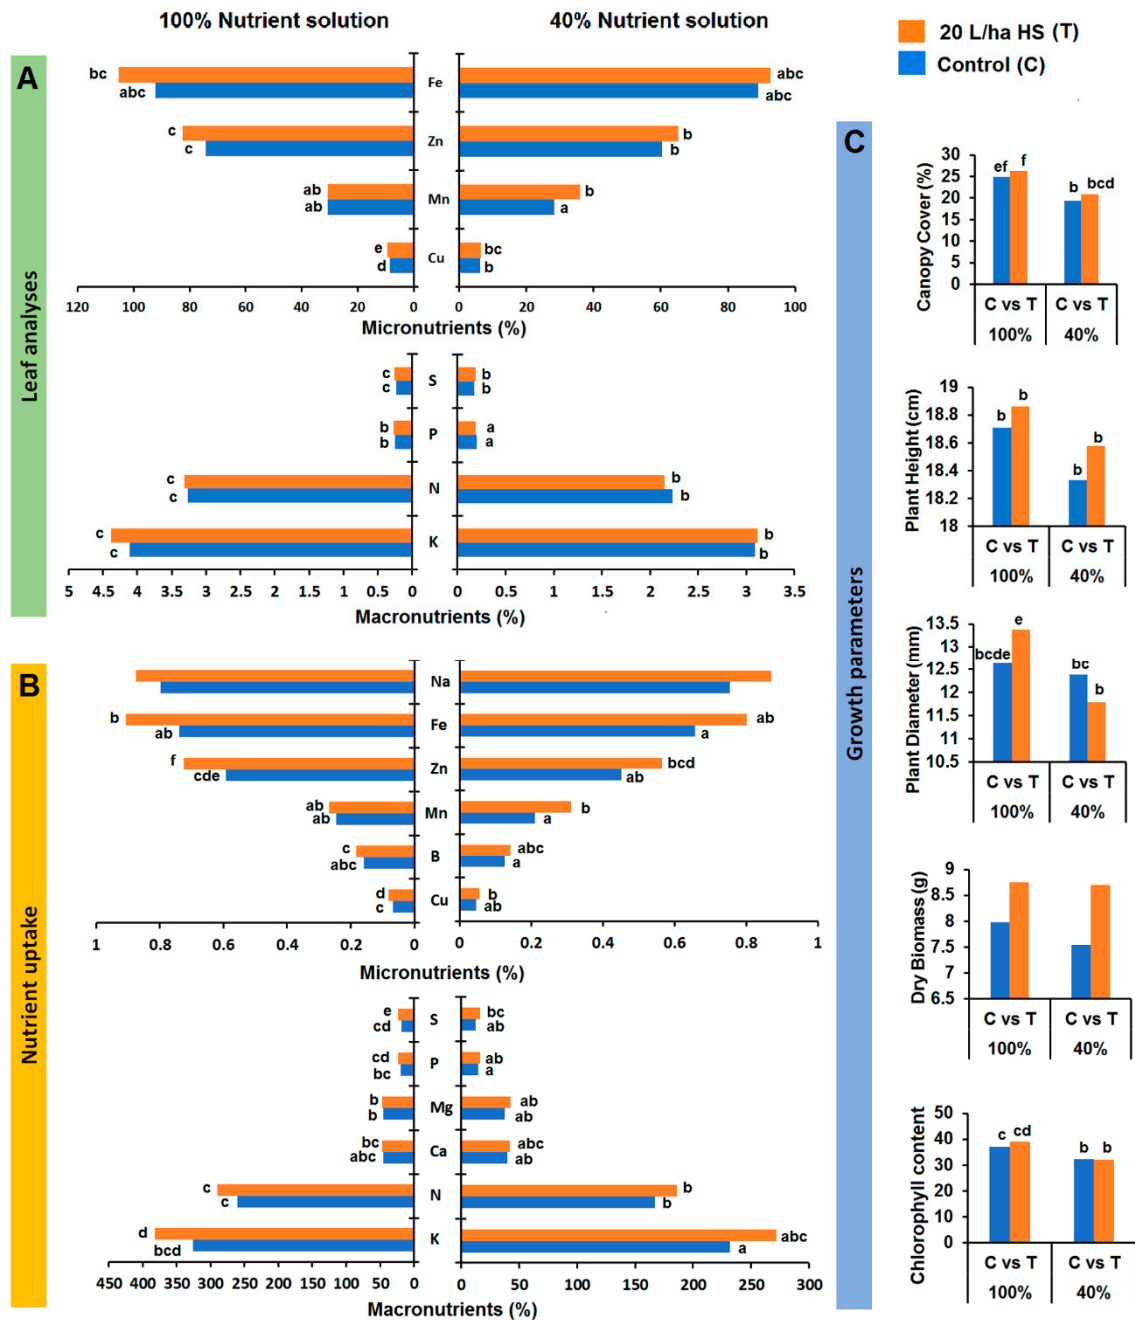

**Figure S1: Morphophysiological assessments.** (A-B) The humic substances (HS) application improved the nutrient uptake and leaf content under starved (40% nutrition) and non-starved conditions (100% nutrition). (C) The growth parameters were also enhanced by HS treatment under starved and non-starved conditions. Treatments containing the same letters are not significantly different from one another ( $p \leq 0.05$ ), and different letters indicate statistically significant differences between treatments;  $p \leq 0.05$ .

**Table S2: Annotated metabolites (level 2, MSI)**

| Metabolite name                            | Abbreviations       | Rt (min) | m/z    | Fragment ions               | Adduct             | Molecular Formula                                             | Class         |
|--------------------------------------------|---------------------|----------|--------|-----------------------------|--------------------|---------------------------------------------------------------|---------------|
| Isocitric acid                             | Iso                 | 1.24     | 191.04 | 173,129,111,85              | [M-H] <sup>-</sup> | C <sub>6</sub> H <sub>7</sub> O <sub>7</sub>                  | Organic acid  |
| Adenosine                                  | Ade                 | 1.67     | 268.09 | 136                         | [M+H] <sup>+</sup> | C <sub>10</sub> H <sub>13</sub> N <sub>5</sub> O <sub>4</sub> | Nucleotide    |
| Isoleucine                                 | Iso                 | 1.92     | 132.00 | 86,69                       | [M+H] <sup>+</sup> | C <sub>6</sub> H <sub>13</sub> NO <sub>2</sub>                | Amino acids   |
| Caffeoylglucarate 1                        | Cafglu 1            | 2.02     | 371.06 | 209,173,143,129,85          | [M-H] <sup>-</sup> | C <sub>15</sub> H <sub>17</sub> O <sub>11</sub>               | HCA compounds |
| Galloyl-hexoside (Glucogallin)             | Gal-hex/galloyl-hex | 2.35     | 331.06 | 168,125                     | [M-H] <sup>-</sup> | C <sub>13</sub> H <sub>16</sub> O <sub>10</sub>               | HCA compounds |
| Caffeoylglucarate 2                        | Cafglu 2            | 2.45     | 371.06 | 209,173,143,129,85          | [M-H] <sup>-</sup> | C <sub>15</sub> H <sub>17</sub> O <sub>11</sub>               | HCA compounds |
| Caffeoylglucarate 3                        | Cafglu 3            | 2.65     | 371.06 | 209,173,143,129,85          | [M-H] <sup>-</sup> | C <sub>15</sub> H <sub>17</sub> O <sub>11</sub>               | HCA compounds |
| 3-Caffeoylquinic acid                      | 3-CafQA             | 3.22     | 353.91 | 191, 179                    | [M-H] <sup>-</sup> | C <sub>16</sub> H <sub>18</sub> O <sub>9</sub>                | HCA compounds |
| Caffeoylhydroxycitric acid 1               | Caf-hyd 1           | 3.39     | 369.04 | 207, 189, 127               | [M-H] <sup>-</sup> | C <sub>15</sub> H <sub>14</sub> O <sub>11</sub>               | HCA compounds |
| trans-3-Caffeoylquinic acid                | 3-CafQA             | 3.43     | 353.09 | 191, 179                    | [M-H] <sup>-</sup> | C <sub>16</sub> H <sub>18</sub> O <sub>9</sub>                | HCA compounds |
| Caffeoylhydroxycitric acid 2               | Caf-hyd 2           | 3.84     | 369.04 | 207, 189, 127               | [M-H] <sup>-</sup> | C <sub>15</sub> H <sub>14</sub> O <sub>11</sub>               | HCA compounds |
| Caffeoylhydroxycitric acid 3               | Caf-hyd 3           | 4.08     | 369.04 | 207, 189, 127               | [M-H] <sup>-</sup> | C <sub>15</sub> H <sub>14</sub> O <sub>11</sub>               | HCA compounds |
| Coumaroylquinic acid                       | CouQA               | 4.15     | 337.09 | 163                         | [M-H] <sup>-</sup> | C <sub>16</sub> H <sub>18</sub> O <sub>8</sub>                | HCA compounds |
| Kynurenic acid                             | Kyn                 | 4.15     | 190.04 | 172,162,144                 | [M+H] <sup>+</sup> | C <sub>10</sub> H <sub>7</sub> NO <sub>3</sub>                | Amino acids   |
| 5-Caffeoylquinic acid                      | 5-CafQA             | 4.40     | 353.08 | 191                         | [M-H] <sup>-</sup> | C <sub>16</sub> H <sub>18</sub> O <sub>9</sub>                | HCA compounds |
| 3-Feruloylquinic acid 1                    | 3-FerQA             | 4.49     | 367.95 | 193, 134                    | [M-H] <sup>-</sup> | C <sub>17</sub> H <sub>20</sub> O <sub>9</sub>                | HCA compounds |
| Coumaroylhydroxycitric acid                | Co-hyd              | 4.67     | 353.07 | 189, 127                    | [M-H] <sup>-</sup> | C <sub>15</sub> H <sub>14</sub> O <sub>10</sub>               | HCA compounds |
| 3-Feruloylquinic acid 2                    | 3-FerQA 2           | 4.72     | 367.10 | 193, 134                    | [M-H] <sup>-</sup> | C <sub>17</sub> H <sub>20</sub> O <sub>9</sub>                | HCA compounds |
| Luteolin diglucoside                       | Lut-diglu           | 4.88     | 609.14 | 447,383,353,327,285,267,188 | [M-H] <sup>-</sup> | C <sub>27</sub> H <sub>30</sub> O <sub>16</sub>               | Flavonoids    |
| Feruloylhydroxycitric acid 1               | Fer-hyd 1           | 5.02     | 383.06 | 188, 127                    | [M-H] <sup>-</sup> | C <sub>16</sub> H <sub>16</sub> O <sub>11</sub>               | HCA compounds |
| 4-Caffeoylquinic acid                      | 4-CafQA             | 5.08     | 353.05 | 191, 173                    | [M-H] <sup>-</sup> | C <sub>16</sub> H <sub>18</sub> O <sub>9</sub>                | HCA compounds |
| Feruloylhydroxycitric acid 2               | Fer-hyd 2           | 5.25     | 383.06 | 188, 127                    | [M-H] <sup>-</sup> | C <sub>16</sub> H <sub>16</sub> O <sub>11</sub>               | HCA compounds |
| Kaempferol neohesperidoside                | Kae-neo             | 5.63     | 593.15 | 473, 447, 327, 285          | [M-H] <sup>-</sup> | C <sub>27</sub> H <sub>30</sub> O <sub>15</sub>               | Flavonoids    |
| beta-glucosyl (sinapoylglucosyl)isovitexin | Isovitexin der      | 5.65     | 962.28 | 593,563,447,367,223         | [M-H] <sup>-</sup> | C <sub>44</sub> H <sub>50</sub> O <sub>24</sub>               | Flavonoids    |
| Luteolin rutinoside                        | Lut-rut             | 5.74     | 593.15 | 447, 285                    | [M-H] <sup>-</sup> | C <sub>27</sub> H <sub>30</sub> O <sub>15</sub>               | Flavonoids    |
| Kaempferol rutinoside rhamnoside           | Kae-rut-rha         | 5.98     | 739.21 | 284                         | [M-H] <sup>-</sup> | C <sub>33</sub> H <sub>40</sub> O <sub>19</sub>               | Flavonoids    |
| Tricin diglucuronoside                     | Tri-diglucu         | 6.19     | 681.13 | 351,300,193                 | [M-H] <sup>-</sup> | C <sub>29</sub> H <sub>30</sub> O <sub>19</sub>               | Flavonoids    |

|                                                        |               |       |        |                        |                       |                                                              |            |
|--------------------------------------------------------|---------------|-------|--------|------------------------|-----------------------|--------------------------------------------------------------|------------|
| Quercetin rhamnoside glucoside                         | Que-rha-glu   | 6.22  | 609.15 | 351,300,178            | [M-H] <sup>-</sup>    | C <sub>27</sub> H <sub>30</sub> O <sub>16</sub>              | Flavonoids |
| Kaempferol rutinoside                                  | Kae-rut       | 6.31  | 593.15 | 324,284                | [M-H] <sup>-</sup>    | C <sub>27</sub> H <sub>30</sub> O <sub>15</sub>              | Flavonoids |
| Rutin                                                  | Rut           | 6.40  | 609.15 | 301, 300, 271          | [M-H] <sup>-</sup>    | C <sub>27</sub> H <sub>30</sub> O <sub>16</sub>              | Flavonoids |
| Dillenetin glucoside glucuronide                       | Dil-glu-glucu | 6.41  | 667.15 | 329                    | [M-H] <sup>-</sup>    | C <sub>29</sub> H <sub>32</sub> O <sub>18</sub>              | Flavonoids |
| Malvidin glucoside                                     | Mal-glu       | 6.70  | 493.13 | 331                    | [M+H] <sup>+</sup>    | C <sub>23</sub> H <sub>25</sub> O <sub>12</sub> <sup>+</sup> | Flavonoids |
| Corchoionoside                                         | Cor           | 6.82  | 399.16 | 219                    | [M-H] <sup>-</sup>    | C <sub>19</sub> H <sub>28</sub> O <sub>9</sub>               | Flavonoids |
| Isorhamnetin rutinoside                                | Iso-rut       | 6.84  | 623.16 | 315                    | [M-H] <sup>-</sup>    | C <sub>28</sub> H <sub>32</sub> O <sub>16</sub>              | Flavonoids |
| Kaemperol rhamnosyl glucoside                          | Kae-rha-glu   | 6.87  | 593.15 | 285                    | [M-H] <sup>-</sup>    | C <sub>27</sub> H <sub>30</sub> O <sub>15</sub>              | Flavonoids |
| Luteolin diglucuronide                                 | Lut-diglucu   | 6.94  | 637.14 |                        | [M-H] <sup>-</sup>    | C <sub>27</sub> H <sub>26</sub> O <sub>18</sub>              | Flavonoids |
| Kaempferitrin                                          | Kaempferitrin | 7.01  | 577.15 | 473,437,413,285        | [M-H] <sup>-</sup>    | C <sub>27</sub> H <sub>30</sub> O <sub>14</sub>              | Flavonoids |
| Tricin (erythro-beta-guaiacylglyceryl) glucopyranoside | Tricin der 1  | 7.04  | 687.19 | 329                    | [M-H] <sup>-</sup>    | C <sub>33</sub> H <sub>36</sub> O <sub>16</sub>              | Flavonoids |
| Maysin                                                 | Maysin        | 7.19  | 575.14 | 411, 473,337, 285, 189 | [M-H] <sup>-</sup>    | C <sub>27</sub> H <sub>28</sub> O <sub>14</sub>              | Flavonoids |
| Luteolin neohesperidoside                              | Lut-neo       | 7.34  | 593.15 | 575,473,285            | [M-H] <sup>-</sup>    | C <sub>27</sub> H <sub>30</sub> O <sub>15</sub>              | Flavonoids |
| Tricin 4'-O-(threo-beta-guaiacylglyceryl) ether        | Tricin der 2  | 9.64  | 525.13 | 329                    | [M-H] <sup>-</sup>    | C <sub>27</sub> H <sub>26</sub> O <sub>11</sub>              | Flavonoids |
| Traumatic acid                                         | Tra/Trau      | 10.24 | 227.12 | 183,165                | [M-H] <sup>-</sup>    | C <sub>12</sub> H <sub>20</sub> O <sub>4</sub>               | Lipids     |
| Oxo-dihydroxy-octadecadienoic acid                     | OxoDioct      | 10.38 | 325.20 | 307,227,209,153        | [M-H] <sup>-</sup>    | C <sub>18</sub> H <sub>30</sub> O <sub>5</sub>               | Lipids     |
| Oxododecanoic acid                                     | Oxo           | 10.44 | 213.14 | 209,195,183,171        | [M-H] <sup>-</sup>    | C <sub>12</sub> H <sub>22</sub> O <sub>3</sub>               | Lipids     |
| TriHOME                                                | TriHOME       | 11.12 | 329.23 | 327,293,211,189        | [M-H] <sup>-</sup>    | C <sub>18</sub> H <sub>34</sub> O <sub>5</sub>               | Lipids     |
| Hydroperoxy-eicosadienoic acid                         | HpEDE         | 11.90 | 339.21 | 307,289,245            | [M-H] <sup>-</sup>    | C <sub>20</sub> H <sub>36</sub> O <sub>4</sub>               | Lipids     |
| Hydroperoxy-octadecatrienoic acid 1                    | HpOTrE 1      | 12.42 | 309.20 | 291                    | [M-H] <sup>-</sup>    | C <sub>18</sub> H <sub>30</sub> O <sub>4</sub>               | Lipids     |
| Dihydroxy-octadecadienoic acid                         | DiHODE        | 12.60 | 311.22 | 309,293,291,211,201    | [M-H] <sup>-</sup>    | C <sub>18</sub> H <sub>32</sub> O <sub>4</sub>               | Lipids     |
| Dihydroxy-octadecatrienoate                            | Dota          | 12.80 | 309.20 | 197,171                | [M-H] <sup>-</sup>    | C <sub>18</sub> H <sub>30</sub> O <sub>4</sub>               | Lipids     |
| Hydroperoxy-octadecatrienoic acid                      | HpOTrE 2      | 12.98 | 309.20 | 291,263,197            | [M-H] <sup>-</sup>    | C <sub>18</sub> H <sub>30</sub> O <sub>4</sub>               | Lipids     |
| DGMG 18:3 Gingerglycolipid A 1                         | DGMG 18:3     | 13.29 | 721.37 | 675,397,277            | [M+HCOO] <sup>-</sup> | C <sub>33</sub> H <sub>56</sub> O <sub>14</sub>              | Lipids     |
| DGMG 18:3/ Gingerglycolipid A 2                        | DGMG 18:3     | 13.62 | 721.37 | 675,397,277            | [M+HCOO] <sup>-</sup> | C <sub>33</sub> H <sub>56</sub> O <sub>14</sub>              | Lipids     |
| Oxo-(pentenyl)cyclopentanoctanoic acid                 | OPC           | 14.37 | 293.21 | 279, 233               | [M-H] <sup>-</sup>    | C <sub>18</sub> H <sub>30</sub> O <sub>3</sub>               | Lipids     |
| MGMG 18:3 1                                            | MGMG 18:3     | 14.53 | 559.31 | 515,277,253            | [M+HCOO] <sup>-</sup> | C <sub>27</sub> H <sub>46</sub> O <sub>9</sub>               | Lipids     |
| Monolinolein                                           | Lino-Gly 1    | 14.60 | 353.26 | 335,261,243,109        | [M+H] <sup>+</sup>    | C <sub>21</sub> H <sub>38</sub> O <sub>4</sub>               | Lipids     |
| MGMG 18:3 2                                            | MGMG 18:3     | 14.83 | 559.31 | 515,277,253            | [M+HCOO] <sup>-</sup> | C <sub>27</sub> H <sub>46</sub> O <sub>9</sub>               | Lipids     |

|                    |            |       |        |                 |                    |                                                |        |
|--------------------|------------|-------|--------|-----------------|--------------------|------------------------------------------------|--------|
| Linoleoyl Glycerol | Lino-Gly 2 | 14.89 | 353.26 | 335,261,243,109 | [M+H] <sup>+</sup> | C <sub>21</sub> H <sub>38</sub> O <sub>4</sub> | Lipids |
| OPDA               | OPDA       | 14.90 | 291.19 |                 | [M-H] <sup>-</sup> | C <sub>18</sub> H <sub>28</sub> O <sub>3</sub> | Lipids |

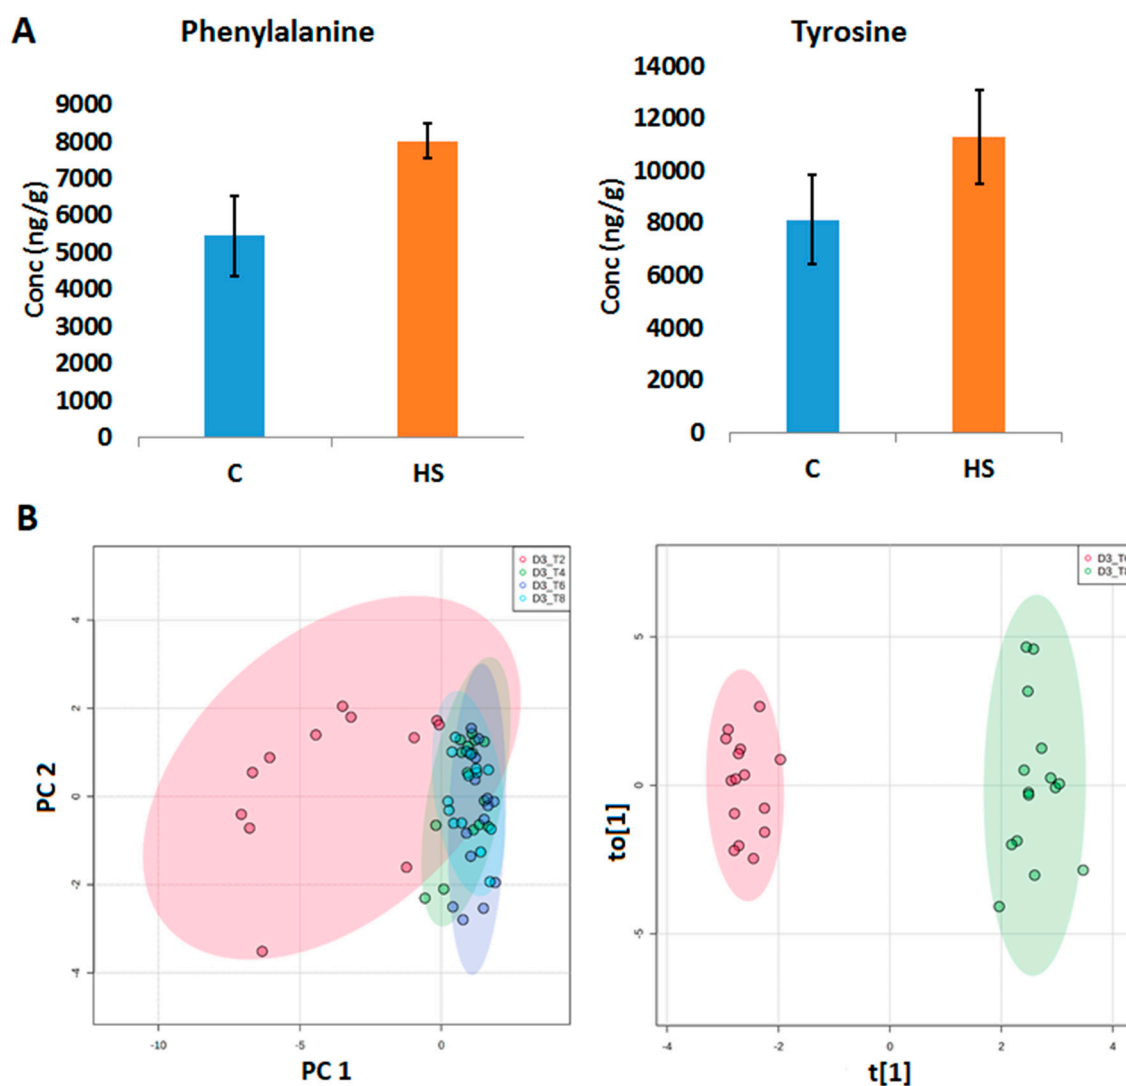

**Figure S2: Relative quantification and chemometric models.** (A) Absolute quantification of aromatic amino acids. (B) Typical chemometrics modeling, applied in this study: (i) principal component analysis (PCA), a score plot (PC1 vs PC2) of a 5-component model (of the Pareto-scaled data matrix X), with cumulative  $R^2$  of 53.2% (explained variation). The unsupervised modelling (PCA) provided a global overview of the data as infographically shown in the PCA scores plots (an example shown in this Figure), allowing the identification of sample grouping and natural clustering in multivariate space: the starved samples (red) group away from the other treatments, whereas the HS-treated samples overlap (cluster together) with samples of normal conditions (control 2, **Table 1**). (ii) A typical OPLS-DA modelling, in this case, a score plot of an OPLS-DA model separating ‘control (red) vs. HS-treated plants (green)’ (under normal conditions), with 1 + 2 + 0 components,  $R^2X = 0.611$ ,  $Q^2 = 0.915$ , CV-ANOVA  $p$ -value less than 0.05. Evaluation of this multivariate (binary) classifier (OPLS-DA) helps in extracting the metabolite variables underlying the classification (separation) of groups.

Table S3: Metamapp data

| PubChem_ID | KEGG_ID | SMILES                                                                                                                                             | Compound_Name                              | HS effects under non-starved conditions |             | Effects of starvation |             | HS effects under starvation |             |
|------------|---------|----------------------------------------------------------------------------------------------------------------------------------------------------|--------------------------------------------|-----------------------------------------|-------------|-----------------------|-------------|-----------------------------|-------------|
|            |         |                                                                                                                                                    |                                            | p-value                                 | Fold change | p-value               | Fold-change | p-value                     | Fold-change |
| 535        | C01234  | <chem>C1CC1(C(=O)O)N</chem>                                                                                                                        | 1-Aminocyclopropanecarboxylic acid         | 2.98E-02                                | 3.18        | 2.33E-01              | 1.34        | 5.18E-01                    | 1.47        |
| 10256      | C08493  | <chem>C1=CC=C2C(=C1)C(=CN2)C=O</chem>                                                                                                              | 1H-Indole-3-carboxaldehyde                 | 8.59E-01                                | 1.10        | 1.51E-01              | 0.76        | 6.77E-01                    | 1.04        |
| 12310831   |         | <chem>C1[C@H]([C@@H]([C@@H](C[C@]1(C(=O)O)O)OC(=O)/C=C/C2=CC(=C(C=C2)O)O)O</chem>                                                                  | 3-Caffeoylquinic acid                      | 6.30E-02                                | 0.28        | 2.09E-02              | 0.73        | 5.79E-01                    | 0.55        |
| 10133609   | C02572  | <chem>COC1=C(C=CC(=C1)C=CC(=O)OC2CC(CC(C2O)O)(C(=O)O)O)O</chem>                                                                                    | 3-Feruloylquinic acid                      | 6.62E-01                                | 1.32        | 4.44E-03              | 0           | 7.24E-02                    | 4 352.27    |
| 58427569   |         | <chem>C1C(C(C(CC1(C(=O)O)O)OC(=O)C=CC2=CC(=C(C=C2)O)O)O</chem>                                                                                     | 4-Caffeoylquinic acid                      | 1.37E-01                                | 1.00        | 2.46E-02              | 0           | 1.34E-07                    | 0           |
| 1794427    | C00852  | <chem>C1C(C(C(CC1(C(=O)O)O)OC(=O)C=CC2=C(C(=C(C=C2)O)O)O)O</chem>                                                                                  | 5-Caffeoylquinic acid                      | 1.61E-07                                | 0.69        | 5.83E-08              | 1.50        | 1.71E-01                    | 1.21        |
| 643732     | C06082  | <chem>CC1=CC(=O)CC(C1(C=CC(=CC(=O)O)C)O)(C)C</chem>                                                                                                | Absciscic acid                             | 1.32E-01                                | 2.69        | 5.79E-04              | 0.67        | 4.65E-01                    | 0.83        |
| 60961      | C00212  | <chem>C1=NC(=C2C(=N1)N(C=N2)[C@H]3[C@@H]([C@@H]([C@H](O3)CO)O)O)N</chem>                                                                           | Adenosine                                  | 9.91E-01                                | 1.00        | 6.47E-02              | 0.57        | 3.08E-03                    | 0.69        |
| 5950       | C00041  | <chem>CC(C(=O)O)N</chem>                                                                                                                           | Alanine                                    | 1.78E-06                                | 1.30        | 8.32E-02              | 1.18        | 7.40E-03                    | 1.50        |
| 5960       | C00049  | <chem>C(C(C(=O)O)N)C(=O)O</chem>                                                                                                                   | Aspartic acid                              | 2.56E-03                                | 1.47        | 6.24E-08              | 0.63        | 2.50E-02                    | 1.42        |
| 72193662   |         | <chem>COC1=CC(=CC(=C1O)OC)C=CC(=O)OCC2C(C(C(C(O2)OC3=C(C(=C4C(=C3)OC(=CC4=O)C5=CC=C(C=C5)OC6C(C(C(C(O6)CO)O)O)O)O)C7C(C(C(C(O7)CO)O)O)O)O)O</chem> | beta-glucosyl (sinapoylglucosyl)isovitexin | 2.28E-03                                | 2.80        | 1.12E-11              | 0.22        | 5.62E-01                    | 0.86        |
| 5459979    | C03062  | <chem>C1=CC(=C(C=C1C=CC(=O)OC(C(C(C(=O)O)O)O)C(=O)O)O)O</chem>                                                                                     | Caffeoylglucarate                          | 5.06E-01                                | 0.92        | 1.48E-03              | 3.75        | 1.66E-05                    | 0           |
| 24797519   |         | <chem>C1=CC(=C(C=C1C=CC(=O)OC(C(=O)O)C(C(=O)O)(C(=O)O)O)O</chem>                                                                                   | Caffeoylhydroxycitric acid                 | 1.04E-05                                | 0.67        | 1.66E-05              | 1.50        | 4.29E-02                    | 1.63        |
| 131751110  |         | <chem>CC1=CC(=O)CC(C1(C=CC(=O)COC2C(C(C(C(O2)CO)O)O)O)(C)C</chem>                                                                                  | Corchoionoside                             | 1.29E-03                                | 0.73        | 1.73E-01              | 1.52        | 8.87E-02                    | 0.81        |
| 131752858  |         | <chem>C1=CC(=CC=C1C=CC(=O)OC(C(=O)O)C(C(=O)O)(C(=O)O)O)O</chem>                                                                                    | Coumaroylhydroxycitric acid                | 3.22E-03                                | 3.52        | 2.61E-05              | 1.67        | 1.89E-01                    | 0.28        |
| 5281766    | C10441  | <chem>C1C(C(C(CC1(C(=O)O)O)OC(=O)C=CC2=CC=C(C=C2)O)O</chem>                                                                                        | Coumaroylquinic acid                       | 1.51E-01                                | 1.37        | 1.22E-01              | 6.27        | 5.30E-01                    | 1.13        |
| 5862       | C00097  | <chem>C(C(C(=O)O)N)S</chem>                                                                                                                        | Cysteine                                   | 1.98E-01                                | 1.26        | 2.01E-02              | 1.48        | 1.05E-01                    | 0.75        |
| 131753022  |         | <chem>O=C(OCC(O)COC2OC(COC1OC(CO)C(O)C(O)C1(O))C(O)C(O)C2(O))CCCCCCCC=CC=CCC=CCC</chem>                                                            | DGMG 18:3/ Gingerglycolipid A              | 9.07E-01                                | 1.02        | 1.37E-02              | 1.54        | 7.68E-02                    | 1.33        |
| 52921872   | C07354  | <chem>CCC=CCC(C(C=CC(=O)CCCCCCCC(=O)O)O)O</chem>                                                                                                   | Dihydroxy-octadecadienoic acid (DiHODE)    | 5.47E-01                                | 1.29        | 1.03E-01              | 0.91        | 1.87E-03                    | 1.78        |
| 6439106    |         | <chem>CCCCCC=CC(C(C=CC=CCCCC(=O)O)O)O</chem>                                                                                                       | Dihydroxy-octadecatrienoate (Dota)         | 3.79E-02                                | 1.50        | 1.07E-02              | 2.38        | 2.43E-01                    | 1.26        |



|           |        |                                                                                                                                                  |                                            |          |      |          |       |          |      |
|-----------|--------|--------------------------------------------------------------------------------------------------------------------------------------------------|--------------------------------------------|----------|------|----------|-------|----------|------|
| 44259417  |        | <chem>COC1=C(C=C(C=C1)C2=C(C(=O)C3=C(O2)C=C(C=C3OC4C(C(C(C(O4)CO)O)O)OC5C(C(C(C(O5)C(=O)O)O)O)O)OC</chem>                                        | Dillenetin glucoside glucuronide           | 8.92E-01 | 0.98 | 3.93E-01 | 0.87  | 1.67E-01 | 1.23 |
| 131752859 |        | <chem>COC1=C(C=CC(=C1)C=CC(=O)OC(C(=O)O)C(CC(=O)O)(C(=O)O)O</chem>                                                                               | Feruloylhydroxycitric acid                 | 1.72E-11 | 1.57 | 9.33E-04 | 0.59  | 6.72E-02 | 1.38 |
| 124021    | C01158 | <chem>C1=C(C=C(C(=C1O)O)O)C(=O)OC2C(C(C(C(O2)CO)O)O)O</chem>                                                                                     | Galloyl-hexoside                           | 6.88E-02 | 0.78 | 2.43E-03 | 26.39 | 1.90E-01 | 1.11 |
| 5282869   |        | <chem>CCCCC(C=CC=CCCCCCCCC(=O)O)O</chem>                                                                                                         | Hydroperoxy-eicosadienoic acid (HpEDE)     | 3.50E-01 | 0.87 | 1.21E-01 | 0.86  | 2.73E-01 | 0.80 |
| 53792623  | C04785 | <chem>CCCCCCCCC(CC=CC=CC=CC(=O)O)OO</chem>                                                                                                       | Hydroperoxy-octadecatrienoic acid (HpOTrE) | 3.79E-02 | 1.50 | 3.29E-01 | 0.84  | 5.98E-01 | 1.10 |
| 69867     | C19837 | <chem>C1=CC=C2C(=C1)C(=CN2)C(=O)O</chem>                                                                                                         | Indole-3-carboxylic acid                   | 6.43E-01 | 1.68 | 3.93E-01 | 0.87  | 9.00E-01 | 0.97 |
| 802       | C00954 | <chem>C1=CC=C2C(=C1)C(=CN2)CC(=O)O</chem>                                                                                                        | Indoleacetic acid                          | 4.77E-01 | 1.36 | 3.27E-01 | 0.83  | 9.00E-01 | 0.65 |
| 1198      | C00311 | <chem>C(C(C(C(=O)O)O)C(=O)O)C(=O)O</chem>                                                                                                        | Isocitric acid                             | 5.08E-01 | 0.89 | 4.29E-01 | 0.41  | 8.55E-01 | 0.95 |
| 6306      | C00407 | <chem>CC[C@H](C)[C@@H](C(=O)O)N</chem>                                                                                                           | Isoleucine                                 | 3.16E-07 | 4.25 | 1.84E-01 | 1.47  | 3.87E-01 | 1.70 |
| 133562525 | C10084 | <chem>CC1C(C(C(C(O1)OCC2C(C(C(C(O2)OC3=C(OC4=CC(=CC(=C4C3=O)O)O)C5=CC(=C(C=C5)O)OC)O)O)O)O)O</chem>                                              | Isorhamnetin rutinoside                    | 3.06E-03 | 0.71 | 3.00E-01 | 0.56  | 7.76E-01 | 0.96 |
| 5486199   | C16981 | <chem>CC1C(C(C(C(O1)OC2=CC(=C3C(=C2)OC(=C(C3=O)OC4C(C(C(C(O4)C)O)O)O)C5=CC(=C(C=C5)O)O)O)O)O</chem>                                              | Kaempferitrin                              | 6.19E-01 | 0.92 | 8.65E-01 | 0.98  | 4.27E-03 | 1.47 |
| 90795788  | C21854 | <chem>CC1C(C(C(C(O1)OC2=C(OC3=CC(=CC(=C3C2=O)O)OC4C(C(C(C(O4)CO)O)O)O)C5=C(C=C(C=C5)O)O)O)O</chem>                                               | Kaempferol 3-O-rhamnoside-7-O-glucoside    | 2.35E-05 | 0.60 | 6.46E-04 | 0.63  | 2.66E-06 | 0    |
| 5318761   |        | <chem>CC1C(C(C(C(O1)OC2C(C(C(OC2OC3=C(OC4=CC(=CC(=C4C3=O)O)O)C5=CC(=C(C=C5)O)CO)O)O)O)O)O</chem>                                                 | Kaempferol neohesperidoside                | 6.05E-05 | 0.63 | 2.66E-06 | 1.50  | 7.92E-04 | 1.65 |
| 122173234 | C21833 | <chem>CC1C(C(C(C(O1)OCC2C(C(C(C(O2)OC3=C(OC4=CC(=CC(=C4C3=O)O)O)C5=CC(=C(C=C5)O)O)O)O)O)O</chem>                                                 | Kaempferol rutinoside                      | 1.23E-06 | 0.69 | 2.80E-01 | 0.85  | 4.62E-06 | 4.04 |
| 44258840  |        | <chem>CC1C(C(C(C(O1)OCC2C(C(C(C(O2)OC3=C(OC4=CC(=CC(=C4C3=O)O)OC5C(C(C(C(O5)CO)O)O)C6=CC(=C(C=C6)O)O)O)O)O)O</chem>                              | Kaempferol rutinoside rhamnoside           | 1.30E-01 | 0.91 | 4.09E-08 | 0.22  | 1.96E-02 | 1.24 |
| 3845      |        | <chem>C1=CC=C2C(=C1)C(=O)C=C(N2)C(=O)O</chem>                                                                                                    | Kynurenic acid                             | 5.93E-02 | 1.27 | 7.44E-02 | 0.86  | 4.41E-01 | 0.89 |
| 6256628   |        | <chem>CCCCC/C=C/C/C=C/CCCCCCCC(=O)OCC(CO)O</chem>                                                                                                | Linoleoyl Glycerol                         | 1.23E-03 | 0.67 | 3.27E-03 | 1.51  | 1.92E-01 | 0.82 |
| 442615    | C10102 | <chem>C1=CC(=C(C=C1C2=CC(=O)C3=C(C(=C(C(=C3O2)[C@H]4[C@@H]([C@H]([C@@H]([C@H](O4)CO)O)O)O)[C@H]5[C@@H]([C@H]([C@@H]([C@H](O5)CO)O)O)O)O)O</chem> | Luteolin 6,8-di-C-glucoside                | 4.44E-01 | 1.13 | 5.18E-02 | 0.51  | 2.79E-02 | 2.19 |
| 5282153   | C12632 | <chem>C1=CC(=C(C=C1C2=CC(=O)C3=C(C(=C(C=C3O2)OC4C(C(C(C(O4)C(=O)O)O)OC5C(C(C(C(O5)C(=O)O)O)O)O)O)O</chem>                                        | Luteolin 7-O-beta-D-diglucuronide          | 2.27E-01 | 0.87 | 6.46E-04 | 0.63  | 2.65E-01 | 1.17 |

|           |        |                                                                                                                                   |                                                              |          |      |          |        |          |      |
|-----------|--------|-----------------------------------------------------------------------------------------------------------------------------------|--------------------------------------------------------------|----------|------|----------|--------|----------|------|
| 44258083  | C12630 | CC1C(C(C(C(O1)OC2C(C(C(OC2OC3=CC(=C4C(=C3)OC(=CC4=O)C5=CC(=C(C=C5)O)O)CO)O)O)O)O)O                                                | Luteolin neohesperidoside                                    | 7.66E-02 | 0.86 | 3.32E-01 | 0.93   | 7.50E-01 | 1.02 |
| 12315422  |        | CC1C(C(C(C(O1)OCC2C(C(C(C(O2)OC3=C(C=C4C(=C3)OC(=CC4=O)C5=CC(=C(C=C5)O)O)O)O)O)O)O)O                                              | Luteolin rutinoside                                          | 7.72E-01 | 1.41 | 4.80E-04 | 1.50   | 4.80E-04 | -    |
| 443652    | C12140 | COC1=CC(=CC(=C1O)OC)C2=[O+][C3=CC(=CC(=C3C=C2O[C@H]4[C@@H]([C@H]([C@@H]([C@H](O4)CO)O)O)O)O)O                                     | Malvidin-3-glucoside                                         | 6.54E-07 | 4.22 | 3.18E-01 | 119.08 | 4.54E-01 | 1.66 |
| 70698181  |        | C[C@@H]1[C@H]([C@@H]([C@@H]([C@H](O1)O[C@H]2[C@H](C(=O)[C@@H](O[C@@H]2C3=C(C4=C(C=C3O)OC(=CC4=O)C5=CC(=C(C=C5)O)O)C)O)O)O)O       | Maysin                                                       | 5.90E-03 | 0.73 | 4.05E-01 | 6.49   | 1.29E-01 | 1.16 |
| 6137      | C00073 | CSCCC(C(=O)O)N                                                                                                                    | Methionine                                                   | 1.03E-01 | 1.31 | 6.79E-03 | 0.45   | 9.58E-02 | 0.88 |
| 72984398  |        | O=C(OCC(O)COC1OC(CO)C(O)C1(O))CCCCCCCC=CCC=CCC=CCC                                                                                | MGMG 18:3                                                    | 4.08E-03 | 0.42 | 1.26E-02 | 0.43   | 3.75E-01 | 1.33 |
| 5283469   |        | CCCC/C=C\C/C=C\C\CCCCCCCC(=O)OCC(CO)O                                                                                             | Monolinolein                                                 | 1.93E-03 | 0.52 | 1.69E-01 | 0.64   | 4.09E-01 | 1.30 |
| 4448      | C01226 | CCC=CCC1C(C=CC1=O)CCCCCCCC(=O)O                                                                                                   | OPDA                                                         | 1.59E-01 | 0.26 | 1.74E-01 | 0.47   | 5.83E-01 | 1.40 |
| 440477    | C04780 | CCC=CCC1C(CCC1=O)CCCCCCCC(=O)O                                                                                                    | Oxo-(pentenyl)cyclopentanoctanoic acid                       | 2.04E-04 | 0.77 | 5.08E-10 | 0.50   | 1.18E-02 | 1.28 |
| 25755602  | C20186 | CCCCC=CCC=CC(CCC(CCCC(=O)O)O)O                                                                                                    | Oxo-dihydroxy-octadecadienoic acid                           | 1.08E-03 | 0.69 | 8.26E-01 | 1.04   | 5.16E-02 | 1.36 |
| 439717    | C02367 | C(CCCCCC(=O)O)CCCCC=O                                                                                                             | Oxododecanoic acid                                           | 1.08E-03 | 0.69 | 1.08E-03 | 0.69   | 1.99E-03 | 1.41 |
| 6140      | C00079 | C1=CC=C(C=C1)CC(C(=O)O)N                                                                                                          | Phenylalanine                                                | 8.31E-06 | 1.47 | 3.44E-02 | 0.63   | 1.37E-02 | 1.89 |
| 145742    | C00148 | C1CC(NC1)C(=O)O                                                                                                                   | Proline                                                      | 6.64E-01 | 1.09 | 3.61E-06 | 0.44   | 8.87E-04 | 1.31 |
| 6325870   | C19796 | C[C@H]1[C@@H]([C@H]([C@H]([C@@H](O1)OC2=C(OC3=CC(=CC(=C3C2=O)O)O[C@H]4[C@@H]([C@H]([C@@H]([C@H](O4)CO)O)O)C5=CC(=C(C=C5)O)O)O)O)O | Quercetin 3-O-rhamnoside 7-O-glucoside                       | 2.53E-04 | 0.55 | 5.68E-01 | 1.10   | 7.72E-01 | 0.95 |
| 5280805   | C05625 | CC1C(C(C(C(O1)OCC2C(C(C(C(O2)OC3=C(OC4=CC(=CC(=C4C3=O)O)O)C5=CC(=C(C=C5)O)O)O)O)O)O)O                                             | Rutin                                                        | 2.53E-04 | 0.55 | 8.16E-03 | 1.50   | 8.22E-03 | 0.00 |
| 338       | C00805 | C1=CC=C(C(=C1)C(=O)O)O                                                                                                            | Salicylic acid                                               | 1.78E-06 | 1.82 | 9.00E-01 | 0.75   | 9.00E-01 | 0.90 |
| 5951      | C00065 | C(C(C(=O)O)N)O                                                                                                                    | Serine                                                       | 8.00E-01 | 1.00 | 1.07E-07 | 0.23   | 5.65E-01 | 1.05 |
| 6288      | C00188 | CC(C(C(=O)O)N)O                                                                                                                   | Threonine                                                    | 5.91E-06 | 1.48 | 3.96E-04 | 0.65   | 7.46E-03 | 1.30 |
| 6443509   | C16308 | C(CCO)CC(CCC=CC=CC(=O)O)O                                                                                                         | TRAUMATIC ACID                                               | 1.69E-02 | 1.71 | 1.09E-01 | 1.38   | 3.15E-01 | 1.20 |
| 122376003 |        | COC1=CC(=CC(=C1OC(CO)C(C2=CC(=C(C=C2)O)OC)OC3C(C(C(C(O3)CO)O)O)OC)C4=CC(=O)C5=C(C=C(C=C5O4)O)O                                    | Tricin (erythro-beta-guaiacylglyceryl) ether glucopyranoside | 5.72E-01 | 0.93 | 3.36E-03 | 0.54   | 5.72E-01 | 1.14 |
| 53262853  | C10193 | COC1=CC(=CC(=C1OC(CO)C(C2=CC(=C(C=C2)O)OC)O)OC)C3=CC(=O)C4=C(C=C(C=C4O3)O)O                                                       | Tricin 4'-O-(threo-beta-guaiacylglyceryl) ether              | 2.99E-01 | 0.82 | 3.53E-02 | 0.64   | 4.29E-01 | 1.19 |

|           |        |                                                                                                               |                        |          |      |          |      |          |      |
|-----------|--------|---------------------------------------------------------------------------------------------------------------|------------------------|----------|------|----------|------|----------|------|
| 131752191 |        | <chem>COC1=CC(=CC(=C1O)OC)C2=CC(=O)C3=C(C=C(C=C3O2)OC4C(C(C(C(O4)C(=O)O)O)O)OC5C(C(C(C(O5)C(=O)O)O)O)O</chem> | Tricin diglucuronoside | 3.13E-01 | 1.11 | 3.61E-02 | 0.78 | 3.82E-01 | 1.13 |
| 9858729   | C14833 | <chem>CCCCC(C(C=CC(CCCCCCCC(=O)O)O)O)O</chem>                                                                 | TriHOME                | 1.39E-02 | 1.38 | 2.50E-01 | 0.81 | 3.64E-02 | 1.49 |
| 6305      | C00078 | <chem>C1=CC=C2C(=C1)C(=CN2)CC(C(=O)O)N</chem>                                                                 | Tryptophan             | 7.90E-01 | 1.00 | 1.25E-04 | 0.61 | 5.74E-04 | 1.52 |
| 6057      | C00082 | <chem>C1=CC(=CC=C1CC(C(=O)O)N)O</chem>                                                                        | Tyrosine               | 9.72E-04 | 1.42 | 9.00E-01 | 1.00 | 1.09E-02 | 1.25 |
| 6287      | C00183 | <chem>CC(C)C(C(=O)O)N</chem>                                                                                  | Valine                 | 6.59E-06 | 1.66 | 6.18E-01 | 0.98 | 5.83E-02 | 1.23 |

**Table S4.** The **MRM-MS method** developed and optimized by direct infusion and the collision energy (CE) optimized for transitions of each compound using the MRM optimization method tool.

| Compound name       | Rt (min) | Ion mode           | <i>m/z</i> | Transition                    | CE (eV)        | Quadrupole 1 (Q1), V | Quadrupole 3 (Q3), V | Dwell time (msec) |
|---------------------|----------|--------------------|------------|-------------------------------|----------------|----------------------|----------------------|-------------------|
| <b>Amino acids</b>  |          |                    |            |                               |                |                      |                      |                   |
| Proline (Pro)       | 1.503    | [M+H] <sup>+</sup> | 116.20     | 116.20>70.15<br>116.20>43.10  | -18.0<br>-28.0 | -14.0<br>-13.0       | -11.0<br>-15.0       | 17.0<br>17.0      |
| Cysteine (Cys)      | 1.317    | [M+H] <sup>+</sup> | 241.20     | 151.90                        | -14.0          | -12.0                | -15.0                | 37.0              |
| Serine (Ser)        | 1.341    | [M+H] <sup>+</sup> | 106.20     | 106.20>59.95<br>106.20>88.10  | -13.0<br>-13.0 | -12.0<br>-12.0       | -10.0<br>-18.0       | 17.0<br>17.0      |
| Alanine (Ala)       | 1.406    | [M+H] <sup>+</sup> | 90.20      | 90.20>44.05<br>90.20>44.90    | -13.0<br>-30.0 | -10.0<br>-18.0       | -15.0<br>-16.0       | 17.0<br>17.0      |
| Threonine (Thr)     | 1.409    | [M+H] <sup>+</sup> | 120.20     | 120.20>56.05<br>120.20>74.10  | -16.0<br>-12.0 | -13.0<br>-13.0       | -20.0<br>-28.0       | 17.0<br>17.0      |
| Aspartic acid (Asp) | 1.410    | [M+H] <sup>+</sup> | 134.05     | 134.05>74.10                  | -15.0          | -10.0                | -13.0                | 37.0              |
| Valine (Val)        | 1.730    | [M+H] <sup>+</sup> | 118.20     | 118.20>72.10<br>118.20> 55.05 | -12.0<br>-23.0 | -14.0<br>-14.0       | -12.0<br>-23.0       | 17.0<br>17.0      |
| Methionine (Met)    | 2.142    | [M+H] <sup>+</sup> | 150.20     | 150.20>60.90<br>150.20>56.10  | -17.0<br>-24.0 | -10.0<br>-11.0       | -20.0<br>-24.0       | 17.0<br>17.0      |
| Tyrosine (Tyr)      | 3.292    | [M+H] <sup>+</sup> | 182.00     | 182.0>136.10                  | -14.0          | -13.0                | -24.0                | 37.0              |
| Phenylalanine (Phe) | 5.929    | [M+H] <sup>+</sup> | 166.00     | 166.00>120.10                 | -14.0          | -12.0                | -21.0                | 131.0             |

|                                                 |        |                    |        |               |       |       |       |       |
|-------------------------------------------------|--------|--------------------|--------|---------------|-------|-------|-------|-------|
| <b>Tryptophan (Trp)</b>                         | 6.774  | [M+H] <sup>+</sup> | 205.20 | 205.20>188.05 | -11.0 | -14.0 | -19.0 | 64.0  |
|                                                 |        |                    |        | 205.20>146.10 | -17.0 | -14.0 | -14.0 | 64.0  |
| <b>Hormones</b>                                 |        |                    |        |               |       |       |       |       |
| <b>Abscisic acid (ABA)</b>                      | 7.917  | [M+H] <sup>+</sup> | 265.10 | 265.10>247.20 | -8.0  | -20.0 | -20.0 | 65.6  |
|                                                 |        |                    |        | 265.10>229.30 | -10.0 | -13.0 | -24.0 | 65.6  |
|                                                 |        |                    |        | 265.10>201.15 | -13.0 | -13.0 | -21.0 | 65.6  |
| <b>Indole-3-acetic acid (IAA)</b>               | 26.81  | [M+H] <sup>+</sup> | 176.10 | 176.10>130.10 | -15.0 | -20.0 | -20.0 | 65.6  |
|                                                 |        |                    |        | 176.10>77.20  | -43.0 | -12.0 | -20.0 | 65.6  |
|                                                 |        |                    |        | 176.10>103.10 | -30.0 | -12.0 | -22.0 | 65.6  |
| <b>Salicylic acid (SA)</b>                      | 22.598 | [M-H] <sup>-</sup> | 137.00 | 137.00>92.95  | 15.0  | 20.0  | 20.0  | 65.6  |
|                                                 |        |                    |        | 137.00>65.00  | 28.0  | 14.0  | 10.0  | 65.6  |
|                                                 |        |                    |        | 137.00>75.05  | 32.0  | 14.0  | 27.0  | 65.6  |
| <b>Amino-cyclopropane carboxylic acid (ACC)</b> | 1.58   | [M+H] <sup>+</sup> | 101.60 | 101.60>56.20  | -14.0 | -18.0 | -21.0 | 65.6  |
|                                                 |        |                    |        | 101.60>28.15  | -23.0 | -18.0 | -10.0 | 65.6  |
|                                                 |        |                    |        | 101.60>30.20  | -37.0 | -18.0 | -30.0 | 65.6  |
| <b>Indole-3-carboxaldehyde* (I3A)</b>           | 16.602 | [M+H] <sup>+</sup> | 146.05 | 146.05        | -25.0 | -     | -     | 100.0 |
| <b>Indole-3-carboxylic acid* (I3CA)</b>         | 22.002 | [M+H] <sup>+</sup> | 161.95 | 161.95        | -15.0 | -     | -     | 100.0 |

\* These compounds did not fragment, thus quantified using single ion monitoring (SIM)
